# Supplementary material
Source: publisher figshare collection journal article supplement (https://tandf.figshare.com/ndownloader/files/14464619)
Supplement: Supplementary file 1 [file 14464619]

Supplementary material

Table S1 Relative growth rate of different type species

| Species | Relative growth rate (M±s.e) | | | | | | |
| --- | --- | --- | --- | --- | --- | --- | --- |
| CK | N2 | N5 | N10 | N2+P | N5+P | N10+P |
| *S. purpurea* (g. g -1.d-1) | 0.037±0.007 | 0.057±0.008 | 0.062±0.006 | 0.065±0.009 | 0.065±0.004 | 0.080±0.003 | 0.077±0.003 |
| *P. litwinowiana* (g. g -1.d-1) | 0.048±0.003 | 0.063±0.006 | 0.090±0.014 | 0.085±0.009 | 0.059±0.004 | 0.098±0.005 | 0.110±0.013 |
| *C. moorcroftii* (g. g -1.d-1) | 0.031±0.010 | 0.041±0.011 | 0.046±0.002 | 0.047±0.003 | 0.046±0.009 | 0.061±0.006 | 0.063±0.009 |
| *A. nanschanica* (g. g -1.d-1) | 0.048±0.004 | 0.054±0.005 | 0.063±0.005 | 0.067±0.006 | 0.052±0.009 | 0.069±0.006 | 0.066±0.006 |
| *L. nanum* (g. g -1.d-1) | 0.043±0.013 | 0.058±0.005 | 0.063±0.013 | 0.062±0.007 | 0.060±0.009 | 0.057±0.007 | 0.068±0.009 |
| *A. densiflorus* (g. g -1.d-1) | 0.051±0.011 | 0.059±0.008 | 0.053±0.002 | 0.063±0.008 | 0.054±0.005 | 0.061±0.004 | 0.059±0.004 |


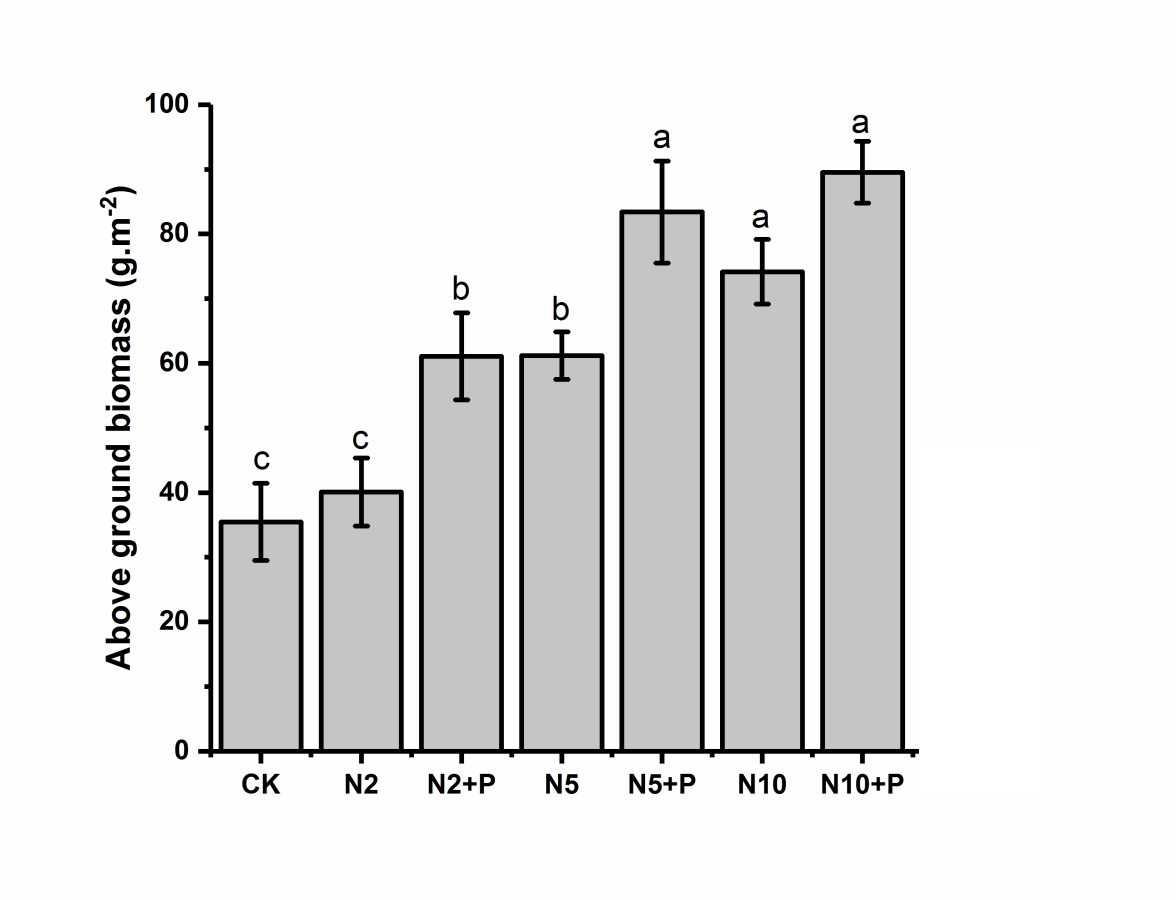


Fig S1 Above ground biomass at different treatments at 2016 in alpine steppe
